1 **Homologous and heterologous serological response to the N-terminal domain of SARS-**  
2 **CoV-2**

3

4 Huibin Lv<sup>1, \*</sup>, Owen Tak-Yin Tsang<sup>2, \*</sup>, Ray T. Y. So<sup>1,3</sup>, Yiquan Wang<sup>1,4</sup>, Meng Yuan<sup>5</sup>, Hejun  
5 Liu<sup>5</sup>, Garrick K. Yip<sup>1</sup>, Qi Wen Teo<sup>1</sup>, Yihan Lin<sup>1</sup>, Weiwen Liang<sup>1</sup>, Jinlin Wang<sup>1</sup>, Wilson W.  
6 Ng<sup>1</sup>, Ian A. Wilson<sup>5,6</sup>, J. S. Malik Peiris<sup>1,3</sup>, Nicholas C. Wu<sup>4,7,8, §</sup>, Chris K. P. Mok<sup>1, §</sup>

7

8 1 HKU-Pasteur Research Pole, School of Public Health, Li Ka Shing Faculty of Medicine,  
9 The University of Hong Kong, Hong Kong SAR, China

10 2 Infectious Diseases Centre, Princess Margaret Hospital, Hospital Authority of Hong Kong.

11 3 School of Public Health, Li Ka Shing Faculty of Medicine, The University of Hong Kong,  
12 Hong Kong SAR, China

13 4 Department of Biochemistry, University of Illinois at Urbana-Champaign, Urbana, IL  
14 61801, USA

15 5 Department of Integrative Structural and Computational Biology, The Scripps Research  
16 Institute, La Jolla, CA 92037, USA

17 6 The Skaggs Institute for Chemical Biology, The Scripps Research Institute, La Jolla, CA  
18 92037, USA

19 7 Carl R. Woese Institute for Genomic Biology, University of Illinois at Urbana-Champaign,  
20 Urbana, IL 61801, USA

21 8 Center for Biophysics and Quantitative Biology, University of Illinois at Urbana-  
22 Champaign, Urbana, IL 61801, USA

23

24

25

26 \* These authors contributed equally to the work

27 § Correspondence: [nicwu@illinois.edu](mailto:nicwu@illinois.edu) (N.C.W) and [ch02mkp@hku.hk](mailto:ch02mkp@hku.hk) (C.K.P.M)

28

29

30

31

32

33

34

## 35 **SUMMARY**

36 The increasing numbers of infected cases of coronavirus disease 2019 (COVID-19) caused by  
37 severe acute respiratory syndrome coronavirus 2 (SARS-CoV-2) poses serious threats to  
38 public health and the global economy. Most SARS-CoV-2 neutralizing antibodies target the  
39 receptor binding domain (RBD) and some the N-terminal domain (NTD) of the spike protein,  
40 which is the major antigen of SARS-CoV-2. While the antibody response to RBD has been  
41 extensively characterized, the antigenicity and immunogenicity of the NTD protein are less  
42 well studied. Using 227 plasma samples from COVID-19 patients, we showed that SARS-  
43 CoV-2 NTD-specific antibodies could be induced during infection. As compared to the  
44 serological response to SARS-CoV-2 RBD, the SARS-CoV-2 NTD response is less cross-  
45 reactive with SARS-CoV. Furthermore, neutralizing antibodies are rarely elicited in a mice  
46 model when NTD is used as an immunogen. We subsequently demonstrate that NTD has an  
47 altered antigenicity when expressed alone. Overall, our results suggest that while NTD offers  
48 an alternative strategy for serology testing, it may not be suitable as an immunogen for  
49 vaccine development.

50

## 51 **KEYWORDS**

52 **SARS-CoV-2, COVID-19, N-terminal domain, NTD, serology, immunogen**

53

## 54 **Introduction**

55 The novel coronavirus SARS-CoV-2, which is the pathogen that has caused the COVID-19  
56 pandemic, has spread to over 216 countries (Liu et al., 2020c). COVID-19 patients show  
57 varying disease severity ranging from asymptomatic to requiring intensive care (Liu et al.,  
58 2020d). Many studies have now shown that SARS-CoV-2-specific immunoglobulin G (IgG)  
59 in COVID-19 patients is a key signature of immune response upon the infection (Barnes et  
60 al., 2020; Brouwer et al., 2020; Isho et al., 2020; Jiang et al., 2020; Long et al., 2020; Pinto et  
61 al., 2020; Wang et al., 2020). The spike glycoprotein is the immunodominant target for the  
62 neutralizing antibody response in COVID-19 patients. Importantly, neutralizing antibodies to  
63 the spike are able to maintain detectable levels through at least 5-8 months post-infection  
64 (Dan et al., 2021; Lau et al., 2021; Ripperger et al., 2020; Roltgen et al., 2020; Wajnberg et  
65 al., 2020). The spike protein consists of S1 (head) and S2 (stem) subunits that are initially  
66 connected by a furin cleavage site (Walls et al., 2020). The S1 contains two structurally well-  
67 defined domains, namely the N-terminal domain (NTD) and receptor binding domain (RBD).

68

69 SARS-CoV-2 initiates viral entry by engaging the host receptor angiotensin converting  
70 enzyme 2 (ACE2) through the RBD. Most known SARS-CoV-2 neutralizing antibodies to  
71 date are RBD-specific (Barnes et al., 2020; Brouwer et al., 2020; Cao et al., 2020; Ju et al.,  
72 2020; Liu et al., 2020a; Liu et al., 2020b; Pinto et al., 2020; Rogers et al., 2020; Seydoux et  
73 al., 2020; Shi et al., 2020; Wu et al., 2020; Zost et al., 2020). Thus, detection of RBD-specific  
74 antibodies is widely used in many serodiagnosis tests (Perera et al., 2020; Premkumar et al.,  
75 2020). RBD has also been a major focus in vaccine design (Dai et al., 2020; Tai et al., 2020;  
76 Zang et al., 2020). In contrast, the immunogenicity and antigenicity of other domains on the  
77 spike is not very well characterized. An increasing number of neutralizing antibodies to the  
78 NTD have recently been identified from COVID-19 patients (Cerutti et al., 2021; Chi et al.,  
79 2020; Liu et al., 2020b; McCallum et al., 2021; Noy-Porat et al., 2021; Suryadevara et al.,  
80 2021; Wang et al., 2021a). In addition, tyrosine-protein kinase receptor UFO (AXL) is  
81 suggested to be a co-receptor for SARS-CoV-2 by interacting with the NTD (Wang et al.,  
82 2021b). Another recent finding shows that the NTD can interact with tetrapyrrole products  
83 that reduce the reactivity of the SARS-CoV-2 spike with human immune sera as a possible  
84 mechanism to evade antibody immunity (Rosa et al., 2021). It is thus believed that  
85 neutralizing antibodies to NTD antibodies may play an important role in protection against  
86 SARS-CoV-2. However, the NTD-specific antibodies have been mainly identified from  
87 clonal B cells of individuals. The serological response to the NTD in COVID-19 patients, as  
88 well as the immunological properties of NTD are not yet well understood. In this study, we  
89 evaluated the human serological response to NTD protein from 227 specimens collected from  
90 141 COVID-19 patients. The cross-reactivity of NTD-specific antibody response to different  
91 coronaviruses was also examined. We also explored the serological response by using NTD  
92 as an immunogen for immunization in mice.

93

## 94 **Results**

### 95 **Human serological responses to the NTD of SARS-CoV-2**

96 We tested 227 plasma samples from 141 RT-PCR confirmed COVID-19 patients in Hong  
97 Kong and another 195 plasma samples from healthy blood donors that were collected prior to  
98 the emergence of SARS-CoV-2 as baseline controls. The samples were tested in parallel in  
99 ELISA assays for the IgG against NTD and RBD. For each assay, samples were defined as  
100 seropositive if the detection signal was three standard deviations above the mean of baseline  
101 controls. There was a progressive increase of seropositivity in the NTD ELISA after the first  
102 day of symptom onset, with 25% (12 out of 48) being positive in the first two weeks and

103 84.9% (152 out of 179) after day 14 to day 141 (Table 1; Figure 1A). Consistent with our  
104 previous study (Perera et al., 2020), the positivity in the RBD assay also progressively  
105 increased with time after illness onset, with 58.3% (28 out of 48) specimens positive in the  
106 first two weeks of illness onset and 98.3% (176 of 179) after day 14 to day 150?? (Table 1,  
107 Figure 1B). Specimens that were found to be positive in the NTD ELISA (n=164) were also  
108 positive in the RBD ELISA. In fact, there was a strong correlation between the serological  
109 response to NTD and RBD proteins after day 8 of symptom onset (Pearson correlation =  
110 0.78) (Figure 1C).

111

### 112 **Cross reactivity of the humoral immunity from COVID-19 patients**

113 The extent of cross-reactive serological responses to other coronaviruses during SARS-CoV-  
114 2 infection is not fully understood. Our previous study observed that plasma samples from  
115 COVID-19 patients can cross-react with the RBD of SARS-CoV (Lv et al., 2020b). Here, we  
116 further tested the binding of 227 plasma samples of COVID-19 patients to the NTDs of  
117 SARS-CoV-2 and SARS-CoV. Among the 164 samples with positive binding to the NTD of  
118 SARS-CoV-2, only 8 (4.9%) cross-reacted with the NTD of SARS-CoV in the ELISA  
119 binding assay (Figure 2A). There is no significant correlation in binding between the groups  
120 (Pearson correlation = 0.06). In contrast, among 204 samples that showed positive binding to  
121 the RBD of SARS-CoV-2, 158 (77.5%) cross-reacted to the RBD of SARS-CoV. There is a  
122 significant correlation in binding between these two RBD antigens (Pearson correlation =  
123 0.43) (Figure 2B). This result is consistent with the RBD having a higher sequence  
124 conservation compared to NTD. While the RBDs of SARS-CoV-2 and SARS-CoV share  
125 73% amino-acid sequence identity, their NTDs only share 53% amino-acid sequence identity  
126 (Figure S1A-B).

127

128 To explore whether SARS-CoV-2 infection can lead to serological responses that cross-react  
129 with other human coronaviruses, we selected 118 plasma samples from the COVID-19  
130 patients and tested their binding to the spike proteins of all four known human seasonal  
131 coronaviruses, namely 229E, NL63, HKU-1 and OC43. The results were compared to another  
132 118 plasma samples from healthy blood donors that are age- and sex-matched to the COVID-  
133 19 cohort. As our control, the plasma of COVID-19 patients showed a significantly higher  
134 level of binding to the NTD and RBD of SARS-CoV-2 compared to that of the healthy  
135 controls (Figure 3A and B). Compared to the plasma of healthy controls, the plasma of the  
136 COVID-19 cohort exhibited significantly higher binding to the spike proteins of HKU1 and

137 OC43 (Figure 3E-F). In contrast, plasma of healthy controls and COVID-19 cohort had only  
138 very small differences in binding to the spike proteins of NL63 and 229E, although such a  
139 difference for NL63 is still significant ( $P = 7e-5$ , two-tailed paired t-test, Figure 3C-D). We  
140 also collected longitudinal plasma samples from six COVID-19 patients and tested their  
141 binding to the NTD and RBD of SARS-CoV-2 as well as to the spikes of other human  
142 coronaviruses by ELISA (Figure S2A-F). Although the increases in binding to the NTD and  
143 RBD of SARS-CoV-2 were more dramatic, some patients showed modest elevation of  
144 serological responses against the spike of different human coronaviruses, especially HKU1  
145 and OC43. Of note, SARS-CoV, SARS-CoV-2, HKU1 and OC43 are beta-coronavirus,  
146 whereas NL63 and 229E are alpha-coronavirus. Our results suggest that memory B cells with  
147 epitopes that are conserved among different beta-coronaviruses were boosted after SARS-  
148 CoV-2 infection. Consistently, recent studies have shown that antibodies targeting the S2  
149 domain can acquire broad reactivity among beta-coronaviruses (Huang et al., 2021; Sauer et  
150 al., 2021).

151

#### 152 **Immunization of NTD alone in mice does not induce neutralizing antibody**

153 Since NTD neutralizing antibodies have been shown to confer protection to SARS-CoV-2  
154 (Cerutti et al., 2021; Chi et al., 2020; Liu et al., 2020b; McCallum et al., 2021; Noy-Porat et  
155 al., 2021; Suryadevara et al., 2021), we are interested in evaluating if the NTD protein itself  
156 is immunogenic and can potentially be a vaccine candidate. We adopted our previous  
157 immunization protocol where BALB/c mice were intraperitoneally (i.p.) immunized twice by  
158 SARS-CoV-2 or SARS-CoV NTD protein with Addavax as adjuvant (Wu et al., 2019).  
159 Plasma samples were collected 14 days after the second immunization and their binding to  
160 NTD of SARS-CoV-2 and SARS-CoV was measured by ELISA. We found that  
161 immunization with SARS-CoV-2 NTD could induce homologous and cross-reactive binding  
162 antibodies to the NTD proteins of SARS-CoV-2 and SARS-CoV (Figure 4A). However, no  
163 cross-reactive binding was observed to the SARS-CoV spike protein (Figure 4C). Similarly,  
164 plasma samples from mice immunized with SARS-CoV NTD (Figure 4A and C) could cross-  
165 react with SARS-CoV-2 NTD protein, but not with the SARS-CoV-2 spike. Although spike  
166 binding antibodies could be induced, no viral neutralizing ability could be found after either  
167 SARS-CoV or SARS-CoV-2 NTD protein immunization (Figure 4B). As a control, we also  
168 tested plasma samples of the mice immunized with live SARS-CoV-2 or SARS-CoV for  
169 binding to NTD proteins (Lv et al., 2020a). In contrast to NTD immunization, mice  
170 immunized with the live SARS-CoV-2 or SARS-CoV can only elicit NTD antibodies to the

171 autologous strain (Figure 4A and C). No cross-reactivity was found to the spike proteins of  
172 NL63, 229E, HKU-1 and OC43 (Figure 4D). These observations suggest that there is a  
173 difference in antigenicity between NTD alone and NTD on the spike protein.

174

#### 175 **A putative structural mechanism of altered antigenicity in NTD alone**

176 To further understand the mechanism of differential antibody responses between  
177 immunizations with NTD alone and live virus, we performed a structural analysis of the NTD.  
178 A cluster of conserved residues on NTD is buried by the RBD on the spike protein (Figure  
179 5A), but is solvent exposed when NTD is presented alone (Figure 5B). In contrast, the solvent  
180 exposed surface of NTD on the spike is much less conserved. Together with our observations  
181 above, it is possible that, when immunization is performed using NTD, a reasonable  
182 percentage of antibodies are elicited to the conserved surface of NTD that is buried when  
183 presented on the spike. Besides, NTD is highly N-glycosylated . It is possible that the N-  
184 glycoforms are different between when NTD is expressed alone and when presented on the  
185 spike. Such differences may also contribute to the disparity in antigenicity. Therefore, our  
186 structural analysis offer an explanation of 1) why NTD immunization elicits antibodies that  
187 cross-react with heterologous NTD but not heterologous spike protein (Figure 4A and C), and  
188 2) why immunization with NTD but not live virus, which carries the full spike protein, elicit  
189 antibodies that cross-react with heterologous NTD (Figure 2B).

190

#### 191 **Discussion**

192 Identification of neutralizing antibodies and their targets on SARS-CoV-2 have been a major  
193 research area due to the importance for vaccine development. Over the past year, studies have  
194 shown that both RBD-specific and NTD-specific antibodies can confer potent neutralizing  
195 activity (Barnes et al., 2020; Cerutti et al., 2021; Chi et al., 2020; Ju et al., 2020; Liu et al.,  
196 2020a; Liu et al., 2020b; McCallum et al., 2021; Pinto et al., 2020; Seydoux et al., 2020;  
197 Suryadevara et al., 2021). However, while SARS-CoV-2 RBD protein can be effective in  
198 eliciting neutralizing antibodies (Dai et al., 2020; Tai et al., 2020; Zang et al., 2020), our  
199 studies shows that NTD protein is a poor immunogen for eliciting neutralizing antibodies  
200 since its antigenicity is altered when expressed alone, where responses may be elicited to  
201 epitopes on the NTD that are inaccessible in the spike protein.

202 Nevertheless, NTD protein can be a useful tool for serology testing. After SARS-CoV-2  
203 infection, both RBD and NTD binding antibodies can be induced in the patient plasma  
204 samples after day 14 of symptom onset, suggesting both proteins are suitable for serology  
205 testing. In fact, the SARS-CoV-2 RBD protein has been using for serological diagnosis  
206 (Perera et al., 2020; Premkumar et al., 2020). However, RBD-specific antibodies can be  
207 cross-reactive among SARS-CoV, SARS-CoV-2 and other *Sarbecoviruses* and may result in  
208 false-positives (Cui et al., 2019; Lv et al., 2020a; Rappazzo et al., 2021). Moreover, several  
209 cross-reactive epitopes against RBD also have been identified between SARS-CoV and  
210 SARS-CoV-2 (Liu et al., 2020a; Pinto et al., 2020; Yuan et al., 2020). In contrast, our results  
211 show that the cross-reactivity of NTD-specific antibodies to SARS-CoV is much lower than  
212 RBD-specific antibodies, indicating that NTD protein could minimize false positives and be  
213 an alternative for SARS-CoV-2 serology testing.

214 One interesting finding in our study is that some SARS-CoV-2 infected patients showed  
215 elevation of serological antibody responses against the spike proteins of another two human  
216 coronaviruses, HKU1 and OC43. Immunological imprinting in SARS-CoV-2 infected  
217 patients due to previous seasonal human coronavirus infection has also been reported  
218 (Anderson et al., 2020; Aydillo et al., 2020). Consistently, two conserved cryptic epitopes  
219 located in the S2 domain have recently discovered that enable cross-neutralization among  
220 five human-infecting beta-coronaviruses, including SARS-CoV, SARS-CoV-2, MERS and  
221 OC43 (Huang et al., 2021; Sauer et al., 2021; Song et al., 2020). These observations open up  
222 the possibility to develop a more universal vaccine for beta-coronaviruses.

223

## 224 **Method detail**

225 **Virus and Cell cultures.** Vero and Vero E6 cells were maintained in DMEM medium  
226 supplemented with 10% fetal bovine serum (FBS), and 100 U mL<sup>-1</sup> of Penicillin-  
227 Streptomycin. Sf9 cells (*Spodoptera frugiperda* ovarian cells, female) and High Five cells  
228 (*Trichoplusia ni* ovarian cells, female) were maintained in HyClone insect cell culture  
229 medium.

230

231 Patient-derived SARS-CoV-2 (BetaCoV/Hong Kong/VM20001061/2020 [KH1]) and SARS-  
232 CoV (strain HK39849, SCoV) were passaged in Vero-E6 or Vero cells. The virus stock was  
233 aliquoted and titrated to determine tissue culture infection dose 50% (TCID<sub>50</sub>). The

234 neutralization experiments were carried out in a Bio-safety level 3 (BSL-3) facility at the  
235 School of Public Health, LKS Faculty of Medicine, The University of Hong Kong.

236

237 **Collection of specimens.** Specimens of heparinized blood were collected from the RT-PCR-  
238 confirmed COVID-19 patients at the Infectious Disease Centre of the Princess Margaret  
239 Hospital, Hong Kong. All study procedures were performed after informed consent. Plasma  
240 from healthy blood donors were collected from the Hong Kong Red Cross before the first  
241 COVID-19 case reported on 1<sup>st</sup> December 2019 (March 2018 to November 2019). The study  
242 was approved by the institutional review board of the Hong Kong West Cluster of the  
243 Hospital Authority of Hong Kong (approval number: UW20-169). Day 1 of clinical onset  
244 was defined as the first day of the appearance of clinical symptoms. The blood samples were  
245 centrifuged at 3000 xg for 10 minutes at room temperature for plasma collection. All plasma  
246 was kept in -80°C until used.

247

248 **Mouse immunization.** 6-10 weeks BALB/c mice were immunized with two rounds either  
249 15ug NTD protein or 10<sup>5</sup> TCID<sub>50</sub> live viruses together with 50 µL Addavax, via  
250 intraperitoneal (i.p.) route. The boost dose was given to the mice 21 days after the first  
251 priming. The plasma samples were collected using heparin tubes on day 14 after the second  
252 round of immunization. The experiments were conducted in The University of Hong Kong  
253 Biosafety Level 3 (BSL3) facility. The study protocol was carried out in strict accordance  
254 with the recommendations and was approved by the Committee on the Use of Live Animals  
255 in Teaching and Research of the University of Hong Kong (CULATR 5422-20).

256

257 **Protein expression and purification.** The ectodomain (residues 14-1213) with  
258 R682G/R683G/R685G/K986P/V987P mutations, receptor-binding domain (RBD, residues  
259 319–541) and N-terminal domain (NTD, residues 14 to 305) of the SARS-CoV-2 spike  
260 protein (GenBank: QHD43416.1), as well as the ectodomain (residues 14-1195) with  
261 K968P/V969P mutations, RBD (residues 306-527) and NTD (residues 14-292) of the SARS-  
262 CoV spike protein (GenBank: ABF65836.1) were cloned into a customized pFastBac vector  
263 (Lv et al., 2020b; Wec et al., 2020). The RBD and NTD constructs were fused with an N-  
264 terminal gp67 signal peptide and a C-terminal His<sub>6</sub> tag. Recombinant bacmid DNA was  
265 generated using the Bac-to-Bac system (Life Technologies, Thermo Fisher Scientific).  
266 Baculovirus was generated by transfecting purified bacmid DNA into Sf9 cells using  
267 FuGENE HD (Promega, Madison, US) and subsequently used to infect suspension cultures of



268 High Five cells (Life Technologies) at a multiplicity of infection (MOI) of 5 to 10. Infected  
269 High Five cells were incubated at 28°C with shaking at 110 rpm for 72 h for protein  
270 expression. The supernatant was then concentrated using a Centrimate cassette (10 kDa  
271 molecular weight cutoff for RBD, Pall Corporation, New York, USA). RBD and NTD  
272 proteins were purified by Ni-NTA Superflow (Qiagen, Hilden, Germany), followed by size  
273 exclusion chromatography and buffer exchange to phosphate-buffered saline (PBS). The  
274 spike proteins of 229E, HKU1, NL63 and OC43 were purchased from Sino Biological  
275 (China).

276

277 **ELISA.** A 96-well enzyme-linked immunosorbent assay (ELISA) plate (Nunc MaxiSorp,  
278 Thermo Fisher Scientific) was first coated overnight with 100 ng per well of purified  
279 recombinant protein in PBS buffer. The plates were then blocked with 100 µl of Chonblock  
280 blocking/sample dilution ELISA buffer (Chondrex Inc, Redmon, US) and incubated at room  
281 temperature for 1 h. Each human plasma sample was diluted to 1:100 in Chonblock  
282 blocking/sample dilution ELISA buffer. Each sample was then added into the ELISA plates  
283 for a two-hour incubation at 37°C. After extensive washing with PBS containing 0.1% Tween  
284 20, each well in the plate was further incubated with the anti-human IgG secondary antibody  
285 (1:5000, Thermo Fisher Scientific) for 1 hour at 37°C. The ELISA plates were then washed  
286 five times with PBS containing 0.1% Tween 20. Subsequently, 100 µL of HRP substrate  
287 (Ncm TMB One; New Cell and Molecular Biotech Co. Ltd, Suzhou, China) was added into  
288 each well. After 15 min of incubation, the reaction was stopped by adding 50 µL of 2 M  
289 H<sub>2</sub>SO<sub>4</sub> solution and analyzed on a Sunrise (Tecan, Männedorf, Switzerland) absorbance  
290 microplate reader at 450 nm wavelength (Perera et al., 2020).

291

292 **Plaque reduction neutralization test (PRNT).** Plasma samples were two-fold diluted  
293 starting from a 1:10 dilution and mixed with equal volumes of around 120 plaque-forming  
294 units (pfu) of SARS-CoV-2 or SARS-CoV as determined by Vero E6 and Vero cells  
295 respectively. After 1-hour incubation at 37°C, the plasma-virus mixture was added onto cell  
296 monolayers seated in a 24-well cell culture plate and incubated for 1 hour at 37°C with 5%  
297 CO<sub>2</sub>. The plasma-virus mixtures were then discarded and infected cells were immediately  
298 covered with 1% agarose gel in DMEM medium. After incubation for 3 days at 37°C with  
299 5% CO<sub>2</sub>, the plates were formalin fixed and stained by 0.5% crystal violet solution.  
300 Neutralization titers were determined by the highest plasma dilution that resulted in >90%

301 reduction in the number of pfus. The test was performed in a BSL3 facility at the University  
302 of Hong Kong (Perera et al., 2020).

303

304 **Statistical analysis.** We defined a sample as ELISA antibody positive if the OD value was 3  
305 standard deviations above the mean of the negative controls. Significance between two  
306 groups were determined by Mann-Whitney test with p-values lower than 0.05. Correlation  
307 between plasma samples were assessed using Pearson correlation coefficients. Two-tailed  
308 paired t-tests were performed in Figure 3.

309

### 310 **Acknowledgements**

311 This work was supported by Calmette and Yersin scholarship from the Pasteur International  
312 Network Association (H.L.), Bill and Melinda Gates Foundation OPP1170236 and INV-  
313 004923 (I.A.W.), startup funds from the University of Illinois at Urbana-Champaign  
314 (N.C.W.), the US National Institutes of Health (contract no. HHSN272201400006C)  
315 (J.S.M.P), National Natural Science Foundation of China (NSFC)/Research Grants Council  
316 (RGC) Joint Research Scheme (N\_HKU737/18) (C.K.P.M. and J.S.M.P), the Research  
317 Grants Council of the Hong Kong Special Administrative Region, China (Project no. T11-  
318 712/19-N) (J.S.M.P) and Guangdong Province International Scientific and Technological  
319 Cooperation Projects (grant number 2020A0505100063). We acknowledge the support of the  
320 clinicians who facilitated this study, including Drs Wai Shing Leung, Jacky Man Chun Chan,  
321 Thomas Shiu Hong Chik, John Yu Hong Chan, Daphne Pui-Lin Lau, and Ying Man Ho, and  
322 the dedicated clinical team at Infectious Diseases Centre, Princess Margaret Hospital,  
323 Hospital Authority of Hong Kong and the patients who kindly consented to participate in this  
324 investigation.

325

### 326 **Author contributions**

327 H.L., N.C.W., J.S.M.P. and C.K.P.M. conceived the research idea, planned the study,  
328 obtained research funding, analysed the data and wrote the manuscript. M.Y., H.L., I.A.W.  
329 and N.C.W. expressed and purified the proteins. H.L., R.T.Y.S., Y.W., G.K.Y., Q.T, Y.L.,  
330 W.L., J.W. and W.W.N performed the experiments. O.T.Y.T organized patient recruitment,  
331 data collection and sampling.

332

### 333 **Competing Interests**

334 The authors declare no competing interests.

335

## 336 **Figure Legends**

### 337 **Figure 1. Patient serological responses to SARS-CoV-2 NTD and RBD protein**

338 (A-B) Binding of plasma from SARS-CoV-2 infected patients to SARS-CoV-2 NTD protein  
339 (A) and RBD protein (B) were measured during the days symptom after onset by ELISA  
340 assay. The mean OD<sub>450</sub> ELISA binding values calculated after testing each plasma sample in  
341 duplicate are shown. The plasma sample from healthy donors were used as negative control.  
342 The ELISA cutoff value of NTD and RBD protein were 0.3272 and 0.2607, respectively  
343 (mean + three standard deviations).

344 (C) Pearson correlation (r) was used to assess the relationship between measured SARS-CoV-  
345 2 serological binding responses to SARS-CoV-2 RBD and NTD protein in the SARS-CoV-2  
346 infected patients at consequent time periods.

347

### 348 **Figure 2. Cross-reactive serological response to NTD and RBD protein between SARS- 349 CoV and SARS-CoV-2**

350 (A-B) Pearson correlation (r) was used to evaluate the binding capacity of plasma to SARS-  
351 CoV and SARS-CoV-2 NTD (A) and RBD (B) protein from 227 SARS-CoV-2 infected  
352 patients. The ELISA cutoff value of NTD protein to SARS-CoV and SARS-CoV-2 were  
353 0.5939 and 0.3272, and RBD protein to SARS-CoV and SARS-CoV-2 were 0.2867 and  
354 0.2607, respectively (mean + three standard deviations).

355

### 356 **Figure 3. Cross-reactive serological response to human coronaviruses between COVID- 357 19 patients and healthy donors**

358 (A-B) Binding of plasma samples to SARS-CoV-2 NTD (A), SARS-CoV-2 RBD (B), 229E-  
359 Spike (C), NL63-Spike (D), HKU1-Spike (E) and OC43-Spike protein (F) were tested by  
360 ELISA assay from 118 COVID-2019 patients and age- and sex-matched healthy donors. The  
361 OD<sub>450</sub> value from each dot in the figure was taken by means of two replicates in the same  
362 experiment. P-values were calculated using two-tailed paired t-test (\*\*P<0.001). Error bars  
363 represent standard deviation.

364

### 365 **Figure 4. Serological binding and neutralizing capacity against SARS-CoV and SARS- 366 CoV-2 by NTD protein immunization**

367 (A) Binding of plasma from SARS-CoV-2 NTD protein immunized mice, SARS-CoV NTD  
368 protein immunized mice, live SARS-CoV-2 immunized mice and live SARS-CoV  
369 immunized mice against SARS-CoV and SARS-CoV-2 NTD protein were measured by  
370 ELISA assay. The mean OD<sub>450</sub> values calculated after detecting each plasma sample in

371 duplicate are shown. **(B)** Neutralization activities of plasma from mice immunized with  
372 SARS-CoV-2 NTD protein, SARS-CoV NTD protein, live SARS-CoV-2 and live SARS-  
373 CoV were measured. The value from each dot in the figure was tested by the means of two  
374 replicates in the same assay. **(C)** Binding of plasma from SARS-CoV and SARS-CoV-2 NTD  
375 protein immunized mice against the full spike of SARS-CoV-2 or SARS-CoV. **(D)** Binding  
376 of plasma from SARS-CoV and SARS-CoV-2 NTD protein immunized mice against NL63-  
377 Spike, 229E-Spike, HKU1-Spike and OC43-Spike protein were tested by ELISA assay. The  
378 OD<sub>450</sub> value from each dot in the figure was taken by means of two replicates in the same  
379 experiment. P-values were calculated using two-tailed t-test. Error bars represent standard  
380 deviation.

381

382 **Figure 5. Conservation of NTD protein surface residues between SARS-CoV-2 and**  
383 **SARS-CoV.**

384 **(A-B)** Surface residues of NTD (cyan) that are conserved between SARS-CoV-2 and SARS-  
385 CoV are highlighted in orange on **(A)** the spike protein where two RBD are in the down  
386 conformation (pink) and one RBD is in the up conformation (purple), and on **(B)** NTD alone.  
387 **(C)** NTD antibody supersites (McCallum et al., 2021) highlighted in blue. Oligomannoses  
388 (yellow) were modeled by GlyProt (Bohne-Lang and von der Lieth, 2005).

389 **Figure S1. Sequence alignment for SARS-CoV-2 and SARS-CoV RBD and NTD protein**

390 **(A-B)** The RBD and NTD domain of SARS-CoV (NCBI Reference Sequence: NC\_004718.3)  
391 and SARS-CoV-2 (NCBI Reference Sequence: NC\_045512.2) were aligned by MUSCLE  
392 (<https://www.ebi.ac.uk/Tools/msa/muscle/>). Residues highlighted with green and yellow  
393 represent identical and similar residues respectively. The percentage identity and similarity  
394 are calculated with a Blosum 62 score matrix using Geneious Prime.

395 **Figure S2. Longitudinal serological analysis to human coronaviruses**

396 **(A-F)** Binding of longitudinal plasma samples against SARS-CoV-2 NTD **(A)**, SARS-CoV-2  
397 RBD **(B)**, 229E-Spike **(C)**, NL63-Spike **(D)**, HKU1-Spike **(E)** and OC43-Spike protein **(F)**  
398 from six COVID-2019 patients were measured by ELISA.

399 **Reference**

- 400 Anderson, E.M., Goodwin, E.C., Verma, A., Arevalo, C.P., Bolton, M.J., Weirick, M.E.,  
401 Gouma, S., McAllister, C.M., Christensen, S.R., and Weaver, J. (2020). Seasonal human  
402 coronavirus antibodies are boosted upon SARS-CoV-2 infection but not associated with  
403 protection. medRxiv [doi.org/10.1101/2020.11.06.20227215](https://doi.org/10.1101/2020.11.06.20227215).
- 404 Aydillo, T., Rombauts, A., Stadlbauer, D., Aslam, S., Abelenda-Alonso, G., Escalera, A.,  
405 Amanat, F., Jiang, K., Krammer, F., and Carratala, J. (2020). Antibody immunological  
406 imprinting on COVID-19 patients. medRxiv [doi.org/10.1101/2020.10.14.20212662](https://doi.org/10.1101/2020.10.14.20212662).
- 407 Barnes, C.O., Jette, C.A., Abernathy, M.E., Dam, K.A., Esswein, S.R., Gristick, H.B.,  
408 Malyutin, A.G., Sharaf, N.G., Huey-Tubman, K.E., Lee, Y.E., *et al.* (2020). SARS-CoV-2  
409 neutralizing antibody structures inform therapeutic strategies. *Nature*.
- 410 Bohne-Lang, A., and von der Lieth, C.W. (2005). GlyProt: in silico glycosylation of proteins.  
411 *Nucleic Acids Res* 33, W214-219.
- 412 Brouwer, P.J.M., Caniels, T.G., van der Straten, K., Snitselaar, J.L., Aldon, Y., Bangaru, S.,  
413 Torres, J.L., Okba, N.M.A., Claireaux, M., Kerster, G., *et al.* (2020). Potent neutralizing  
414 antibodies from COVID-19 patients define multiple targets of vulnerability. *Science* 369,  
415 643-650.
- 416 Cao, Y., Su, B., Guo, X., Sun, W., Deng, Y., Bao, L., Zhu, Q., Zhang, X., Zheng, Y., Geng,  
417 C., *et al.* (2020). Potent Neutralizing Antibodies against SARS-CoV-2 Identified by High-  
418 Throughput Single-Cell Sequencing of Convalescent Patients' B Cells. *Cell* 182, 73-84 e16.
- 419 Cerutti, G., Guo, Y., Zhou, T., Gorman, J., Lee, M., Rapp, M., Reddem, E.R., Yu, J., Bahna,  
420 F., Bimela, J., *et al.* (2021). Potent SARS-CoV-2 neutralizing antibodies directed against  
421 spike N-terminal domain target a single supersite. bioRxiv  
422 [doi.org/10.1101/2021.01.10.426120](https://doi.org/10.1101/2021.01.10.426120), 2021.2001.2010.426120.
- 423 Chi, X., Yan, R., Zhang, J., Zhang, G., Zhang, Y., Hao, M., Zhang, Z., Fan, P., Dong, Y.,  
424 Yang, Y., *et al.* (2020). A neutralizing human antibody binds to the N-terminal domain of the  
425 Spike protein of SARS-CoV-2. *Science* 369, 650-655.
- 426 Cui, J., Li, F., and Shi, Z.-L. (2019). Origin and evolution of pathogenic coronaviruses. *Nat*  
427 *Rev Microbiol* 17, 181-192.
- 428 Dai, L., Zheng, T., Xu, K., Han, Y., Xu, L., Huang, E., An, Y., Cheng, Y., Li, S., Liu, M., *et*  
429 *al.* (2020). A universal design of Betacoronavirus vaccines against COVID-19, MERS, and  
430 SARS. *Cell* 182, 722-733 e711.
- 431 Dan, J.M., Mateus, J., Kato, Y., Hastie, K.M., Yu, E.D., Faliti, C.E., Grifoni, A., Ramirez,  
432 S.I., Haupt, S., Frazier, A., *et al.* (2021). Immunological memory to SARS-CoV-2 assessed  
433 for up to 8 months after infection. *Science*.
- 434 Huang, Y., Nguyen, A.W., Hsieh, C.-L., Silva, R., Olaluwoye, O.S., Wilen, R., Kaoud, T.S.,  
435 Azouz, L.R., Qerqez, A.N., Le, K.C., *et al.* (2021). Identification of a conserved neutralizing  
436 epitope present on spike proteins from highly pathogenic coronaviruses. bioRxiv  
437 [doi.org/10.1101/2021.01.31.428824](https://doi.org/10.1101/2021.01.31.428824).
- 438 Isho, B., Abe, K.T., Zuo, M., Jamal, A.J., Rathod, B., Wang, J.H., Li, Z., Chao, G., Rojas,  
439 O.L., Bang, Y.M., *et al.* (2020). Persistence of serum and saliva antibody responses to SARS-  
440 CoV-2 spike antigens in COVID-19 patients. *Sci Immunol* 5, eabe5511.

- 441 Jiang, H.W., Li, Y., Zhang, H.N., Wang, W., Yang, X., Qi, H., Li, H., Men, D., Zhou, J., and  
442 Tao, S.C. (2020). SARS-CoV-2 proteome microarray for global profiling of COVID-19  
443 specific IgG and IgM responses. *Nat Commun* *11*, 3581.
- 444 Ju, B., Zhang, Q., Ge, J., Wang, R., Sun, J., Ge, X., Yu, J., Shan, S., Zhou, B., Song, S., *et al.*  
445 (2020). Human neutralizing antibodies elicited by SARS-CoV-2 infection. *Nature* *584*, 115-  
446 119.
- 447 Lau, E.H.Y., Tsang, O.T.Y., Hui, D.S.C., Kwan, M.Y.W., Chan, W.H., Chiu, S.S., Ko,  
448 R.L.W., Chan, K.H., Cheng, S.M.S., Perera, R., *et al.* (2021). Neutralizing antibody titres in  
449 SARS-CoV-2 infections. *Nat Commun* *12*, 63.
- 450 Liu, H., Wu, N.C., Yuan, M., Bangaru, S., Torres, J.L., Caniels, T.G., van Schooten, J., Zhu,  
451 X., Lee, C.D., Brouwer, P.J.M., *et al.* (2020a). Cross-neutralization of a SARS-CoV-2  
452 antibody to a functionally conserved site is mediated by avidity. *Immunity* *53*, 1272-1280  
453 e1275.
- 454 Liu, L., Wang, P., Nair, M.S., Yu, J., Rapp, M., Wang, Q., Luo, Y., Chan, J.F., Sahi, V.,  
455 Figueroa, A., *et al.* (2020b). Potent neutralizing antibodies against multiple epitopes on  
456 SARS-CoV-2 spike. *Nature* *584*, 450-456.
- 457 Liu, Q., Xu, K., Wang, X., and Wang, W. (2020c). From SARS to COVID-19: What lessons  
458 have we learned? *J Infect Public Health*.
- 459 Liu, Y., Yan, L.M., Wan, L., Xiang, T.X., Le, A., Liu, J.M., Peiris, M., Poon, L.L.M., and  
460 Zhang, W. (2020d). Viral dynamics in mild and severe cases of COVID-19. *Lancet Infect Dis*  
461 *20*, 656-657.
- 462 Long, Q.X., Liu, B.Z., Deng, H.J., Wu, G.C., Deng, K., Chen, Y.K., Liao, P., Qiu, J.F., Lin,  
463 Y., Cai, X.F., *et al.* (2020). Antibody responses to SARS-CoV-2 in patients with COVID-19.  
464 *Nat Med* *26*, 845-848.
- 465 Lv, H., So, R.T., Yuan, M., Liu, H., Lee, C.-C.D., Yip, G.K., Ng, W.W., Wilson, I.A., Peiris,  
466 J.S.M., and Wu, N.C. (2020a). Evidence of antigenic imprinting in sequential Sarbecovirus  
467 immunization. *bioRxiv* [doi.org/10.1101/2020.10.14.339465](https://doi.org/10.1101/2020.10.14.339465).
- 468 Lv, H., Wu, N.C., Tsang, O.T., Yuan, M., Perera, R., Leung, W.S., So, R.T.Y., Chan, J.M.C.,  
469 Yip, G.K., Chik, T.S.H., *et al.* (2020b). Cross-reactive antibody response between SARS-  
470 CoV-2 and SARS-CoV infections. *Cell Rep* *31*, 107725.
- 471 McCallum, M., De Marco, A., Lempp, F., Tortorici, M.A., Pinto, D., Walls, A.C.,  
472 Beltramello, M., Chen, A., Liu, Z., and Zatta, F. (2021). N-terminal domain antigenic  
473 mapping reveals a site of vulnerability for SARS-CoV-2. *bioRxiv*  
474 [doi.org/10.1101/2021.01.14.426475](https://doi.org/10.1101/2021.01.14.426475).
- 475 Noy-Porat, T., Mechaly, A., Levy, Y., Makdasi, E., Alcalay, R., Gur, D., Aftalion, M.,  
476 Falach, R., Leviatan Ben-Arye, S., Lazar, S., *et al.* (2021). Therapeutic antibodies, targeting  
477 the SARS-CoV-2 spike N-terminal domain, protect lethally infected K18-hACE2 mice.  
478 *bioRxiv* [doi.org/10.1101/2021.02.02.428995](https://doi.org/10.1101/2021.02.02.428995).
- 479 Perera, R.A., Mok, C.K., Tsang, O.T., Lv, H., Ko, R.L., Wu, N.C., Yuan, M., Leung, W.S.,  
480 Chan, J.M., Chik, T.S., *et al.* (2020). Serological assays for severe acute respiratory  
481 syndrome coronavirus 2 (SARS-CoV-2), March 2020. *Euro Surveill* *25*, 2000421
- 482 Pinto, D., Park, Y.J., Beltramello, M., Walls, A.C., Tortorici, M.A., Bianchi, S., Jaconi, S.,  
483 Culap, K., Zatta, F., De Marco, A., *et al.* (2020). Cross-neutralization of SARS-CoV-2 by a  
484 human monoclonal SARS-CoV antibody. *Nature* *583*, 290-295.

- 485 Premkumar, L., Segovia-Chumbez, B., Jadi, R., Martinez, D.R., Raut, R., Markmann, A.,  
486 Cornaby, C., Bartelt, L., Weiss, S., Park, Y., *et al.* (2020). The receptor binding domain of the  
487 viral spike protein is an immunodominant and highly specific target of antibodies in SARS-  
488 CoV-2 patients. *Sci Immunol* 5. eabc8413.
- 489 Rappazzo, C.G., Longping, V.T., Kaku, C.I., Wrapp, D., Sakharkar, M., Huang, D., Deveau,  
490 L.M., Yockachonis, T.J., Herbert, A.S., and Battles, M.B. (2021). Broad and potent activity  
491 against SARS-like viruses by an engineered human monoclonal antibody. *Science*.
- 492 Ripperger, T.J., Uhrlaub, J.L., Watanabe, M., Wong, R., Castaneda, Y., Pizzato, H.A.,  
493 Thompson, M.R., Bradshaw, C., Weinkauff, C.C., Bime, C., *et al.* (2020). Orthogonal SARS-  
494 CoV-2 serological assays enable surveillance of low-prevalence communities and reveal  
495 durable humoral immunity. *Immunity* 53, 925-933 e924.
- 496 Rogers, T.F., Zhao, F., Huang, D., Beutler, N., Burns, A., He, W.T., Limbo, O., Smith, C.,  
497 Song, G., Woehl, J., *et al.* (2020). Isolation of potent SARS-CoV-2 neutralizing antibodies  
498 and protection from disease in a small animal model. *Science* 369, 956-963.
- 499 Roltgen, K., Powell, A.E., Wirz, O.F., Stevens, B.A., Hogan, C.A., Najeeb, J., Hunter, M.,  
500 Wang, H., Sahoo, M.K., Huang, C., *et al.* (2020). Defining the features and duration of  
501 antibody responses to SARS-CoV-2 infection associated with disease severity and outcome.  
502 *Sci Immunol* 5, eabe0240.
- 503 Rosa, A., Pye, V.E., Graham, C., Muir, L., Seow, J., Ng, K.W., Cook, N.J., Rees-Spear, C.,  
504 Parker, E., dos Santos, M.S., *et al.* (2021). SARS-CoV-2 recruits a haem metabolite to evade  
505 antibody immunity. *medRxiv* doi.org/10.1101/2021.01.21.21249203.
- 506 Sauer, M., Park, Y.-J., Tortorici, M.A., Walls, A.C., Homad, L., Acton, O., Bowen, J.E.,  
507 Wang, C., Xiong, X., de van der Schueren, W., *et al.* (2021). Structural basis for broad  
508 coronavirus neutralization. *bioRxiv* doi: 10.1101/2020.12.29.424482.
- 509 Seydoux, E., Homad, L.J., MacCamy, A.J., Parks, K.R., Hurlburt, N.K., Jennewein, M.F.,  
510 Akins, N.R., Stuart, A.B., Wan, Y.H., Feng, J., *et al.* (2020). Analysis of a SARS-CoV-2-  
511 infected individual reveals development of potent neutralizing antibodies with limited  
512 somatic mutation. *Immunity* 53, 98-105 e105.
- 513 Shi, R., Shan, C., Duan, X., Chen, Z., Liu, P., Song, J., Song, T., Bi, X., Han, C., Wu, L., *et*  
514 *al.* (2020). A human neutralizing antibody targets the receptor-binding site of SARS-CoV-2.  
515 *Nature* 584, 120-124.
- 516 Song, G., He, W.-t., Callaghan, S., Anzanello, F., Huang, D., Ricketts, J., Torres, J.L.,  
517 Beutler, N., Peng, L., Vargas, S., *et al.* (2020). Cross-reactive serum and memory B cell  
518 responses to spike protein in SARS-CoV-2 and endemic coronavirus infection. *bioRxiv*  
519 doi.org/10.1101/2020.09.22.308965.
- 520 Suryadevara, N., S., S., and Gilchuk P, V.L., Binshtein E, Zost SL, Nargi RS, Sutton RE,  
521 Winkler ES, Chen EC, Fouch M, Davidson E, Doranz B, Carnahan R, Thackray L, Diamond  
522 M, James E. Crowe Jr. (2021). Neutralizing and protective human monoclonal antibodies  
523 recognizing the N-terminal domain of the SARS-CoV-2 spike protein. *bioRxiv*  
524 doi.org/10.1101/2021.01.19.427324.
- 525 Tai, W., Zhang, X., Drelich, A., Shi, J., Hsu, J.C., Luchsinger, L., Hillyer, C.D., Tseng, C.K.,  
526 Jiang, S., and Du, L. (2020). A novel receptor-binding domain (RBD)-based mRNA vaccine  
527 against SARS-CoV-2. *Cell Res* 30, 932-935.

- 528 Wajnberg, A., Amanat, F., Firpo, A., Altman, D.R., Bailey, M.J., Mansour, M., McMahon,  
529 M., Meade, P., Mendu, D.R., Muellers, K., *et al.* (2020). Robust neutralizing antibodies to  
530 SARS-CoV-2 infection persist for months. *Science*.
- 531 Walls, A.C., Park, Y.J., Tortorici, M.A., Wall, A., McGuire, A.T., and Veesler, D. (2020).  
532 Structure, function, and antigenicity of the SARS-CoV-2 spike glycoprotein. *Cell* *181*, 281-  
533 292 e286.
- 534 Wang, C., Li, W., Drabek, D., Okba, N.M.A., van Haperen, R., Osterhaus, A., van  
535 Kuppeveld, F.J.M., Haagmans, B.L., Grosveld, F., and Bosch, B.J. (2020). A human  
536 monoclonal antibody blocking SARS-CoV-2 infection. *Nat Commun* *11*, 2251.
- 537 Wang, P., Liu, L., Iketani, S., Luo, Y., Guo, Y., Wang, M., Yu, J., Zhang, B., Kwong, P.D.,  
538 Graham, B.S., *et al.* (2021a). Increased resistance of SARS-CoV-2 variants B.1.351 and  
539 B.1.1.7 to antibody neutralization. *bioRxiv* [doi.org/10.1101/2021.01.25.428137](https://doi.org/10.1101/2021.01.25.428137).
- 540 Wang, S., Qiu, Z., Hou, Y., Deng, X., Xu, W., Zheng, T., Wu, P., Xie, S., Bian, W., and  
541 Zhang, C. (2021b). AXL is a candidate receptor for SARS-CoV-2 that promotes infection of  
542 pulmonary and bronchial epithelial cells. *Cell Res* *31*, 126-140.
- 543 Wec, A.Z., Wrapp, D., Herbert, A.S., Maurer, D.P., Haslwanter, D., Sakharkar, M., Jangra,  
544 R.K., Dieterle, M.E., Lilov, A., Huang, D., *et al.* (2020). Broad neutralization of SARS-  
545 related viruses by human monoclonal antibodies. *Science* *369*, 731-736.
- 546 Wu, Y., Wang, F., Shen, C., Peng, W., Li, D., Zhao, C., Li, Z., Li, S., Bi, Y., Yang, Y., *et al.*  
547 (2020). A noncompeting pair of human neutralizing antibodies block COVID-19 virus  
548 binding to its receptor ACE2. *Science* *368*, 1274-1278.
- 549 Yuan, M., Wu, N.C., Zhu, X., Lee, C.D., So, R.T.Y., Lv, H., Mok, C.K.P., and Wilson, I.A.  
550 (2020). A highly conserved cryptic epitope in the receptor binding domains of SARS-CoV-2  
551 and SARS-CoV. *Science* *368*, 630-633.
- 552 Zang, J., Gu, C., Zhou, B., Zhang, C., Yang, Y., Xu, S., Bai, L., Zhang, R., Deng, Q., Yuan,  
553 Z., *et al.* (2020). Immunization with the receptor-binding domain of SARS-CoV-2 elicits  
554 antibodies cross-neutralizing SARS-CoV-2 and SARS-CoV without antibody-dependent  
555 enhancement. *Cell Discov* *6*, 61.
- 556 Zost, S.J., Gilchuk, P., Chen, R.E., Case, J.B., Reidy, J.X., Trivette, A., Nargi, R.S., Sutton,  
557 R.E., Suryadevara, N., Chen, E.C., *et al.* (2020). Rapid isolation and profiling of a diverse  
558 panel of human monoclonal antibodies targeting the SARS-CoV-2 spike protein. *Nat Med* *26*,  
559 1422-1427.

560





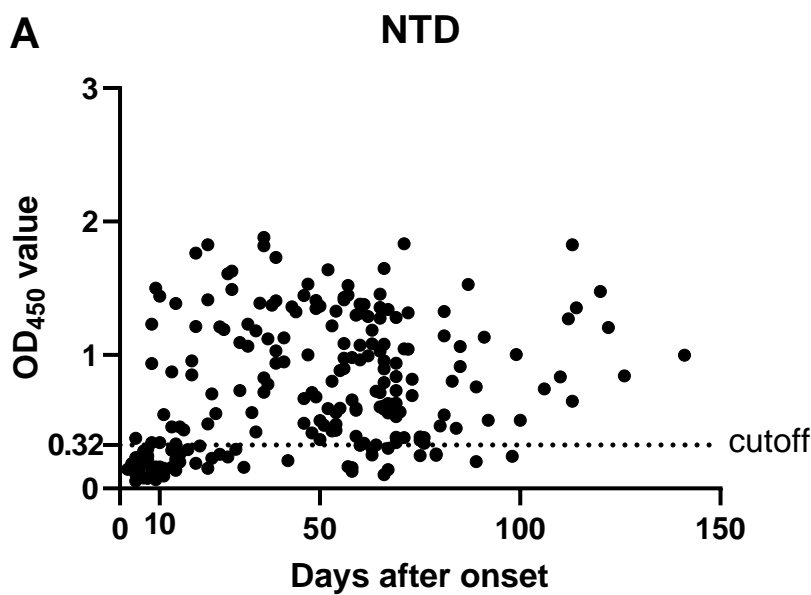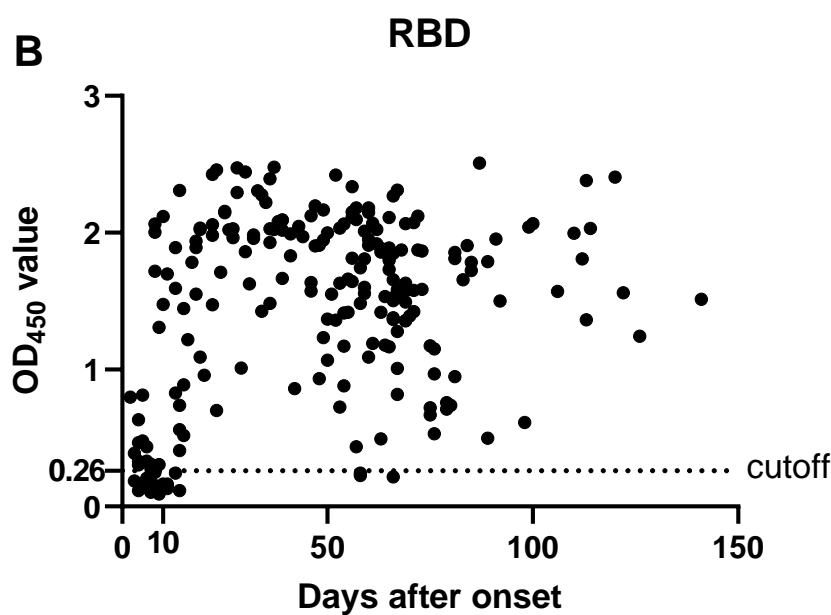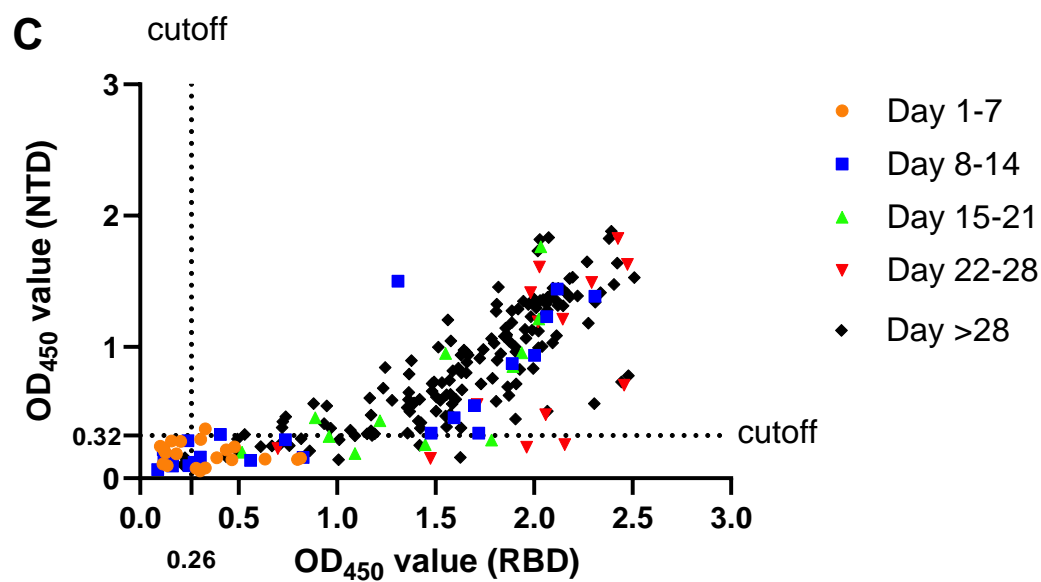

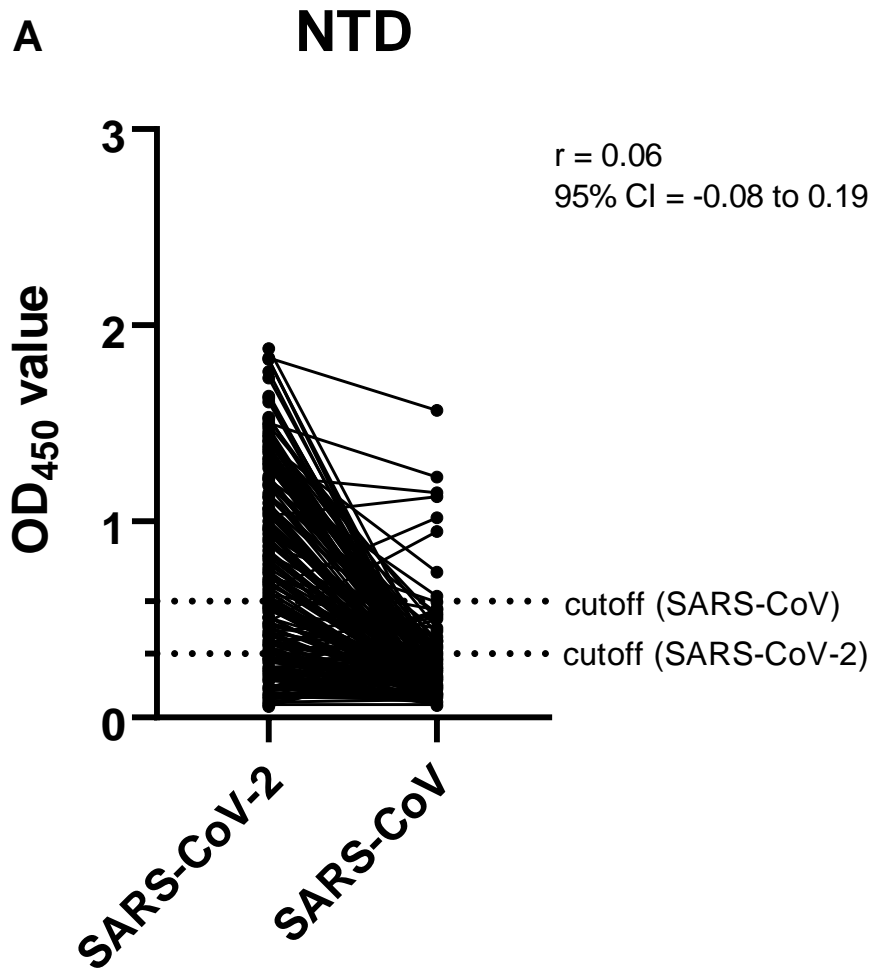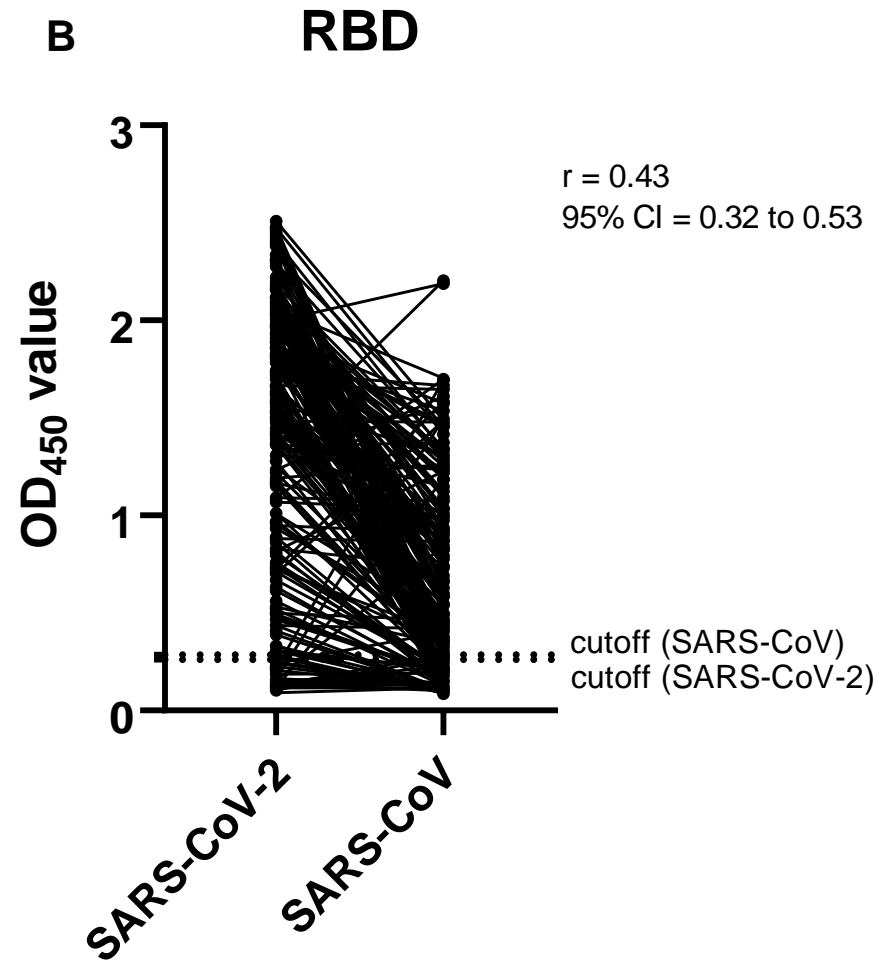

**A SARS-CoV-2-RBD**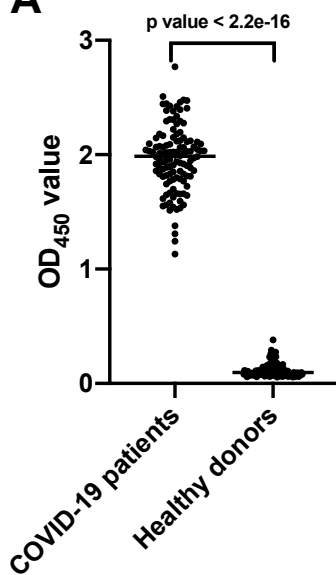**B SARS-CoV-2-NTD**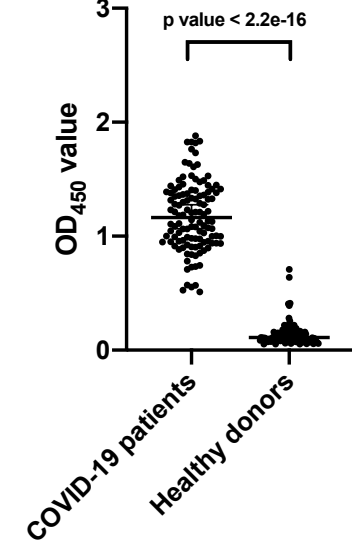**C 229E-S**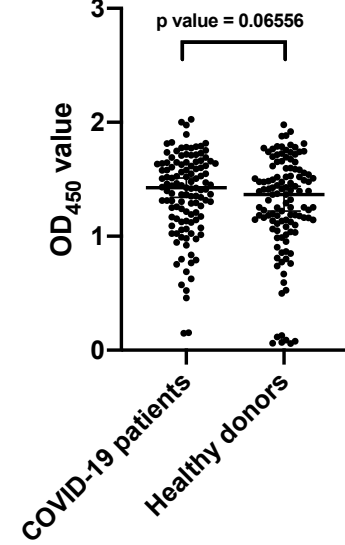**D NL63-S**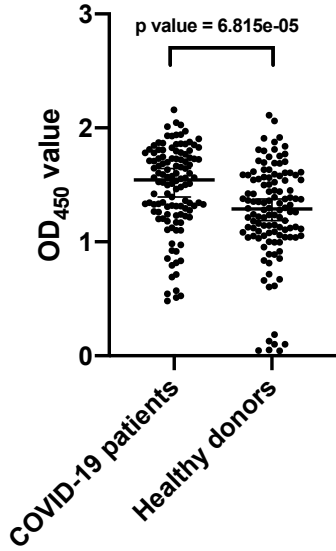**E HKU1-S**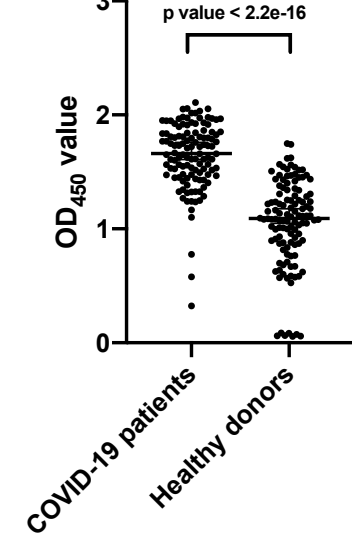**F OC43-S**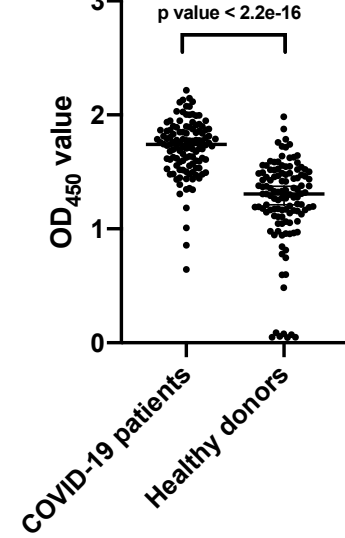

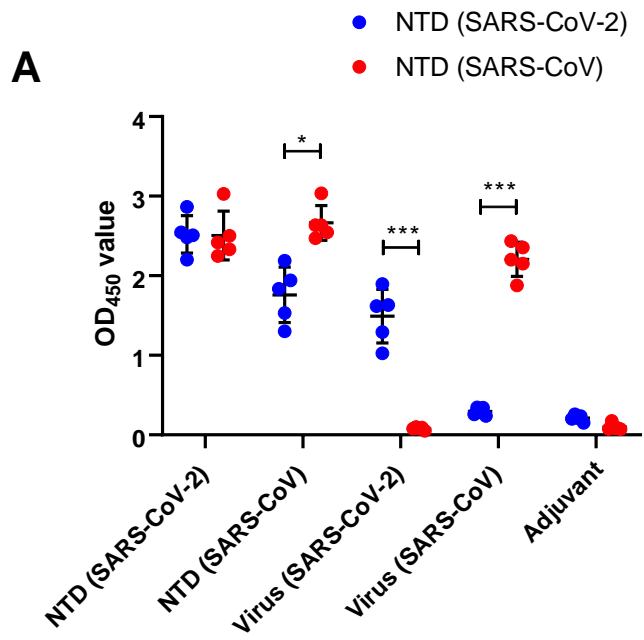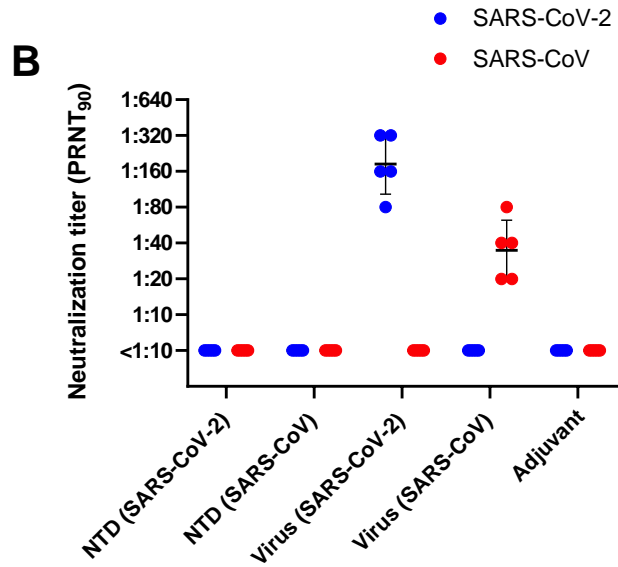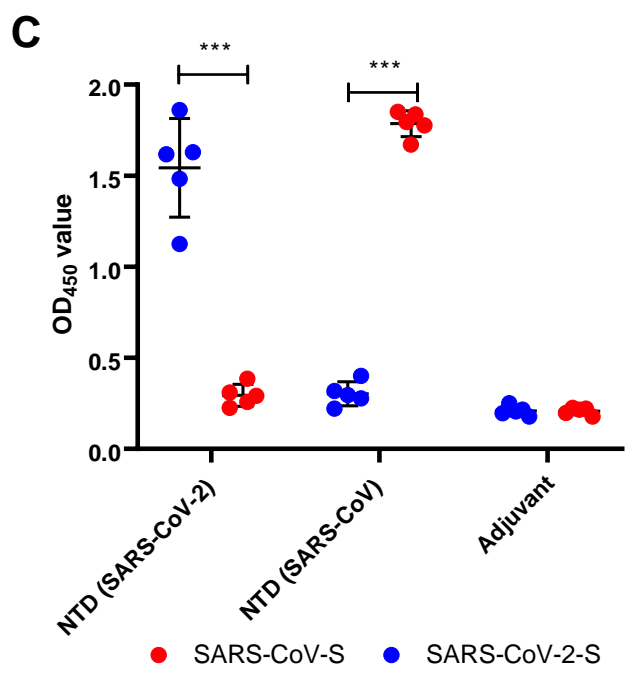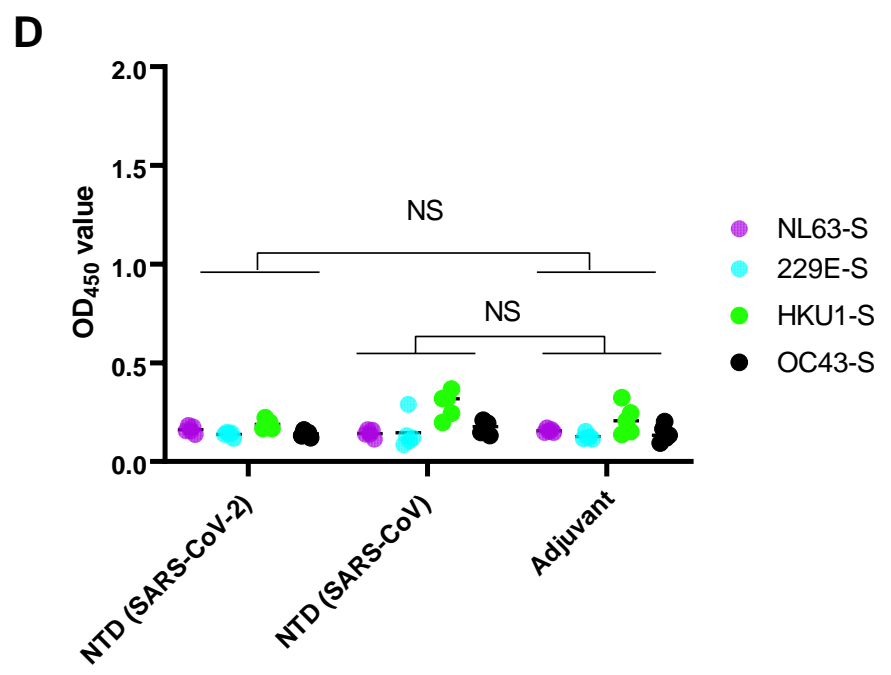

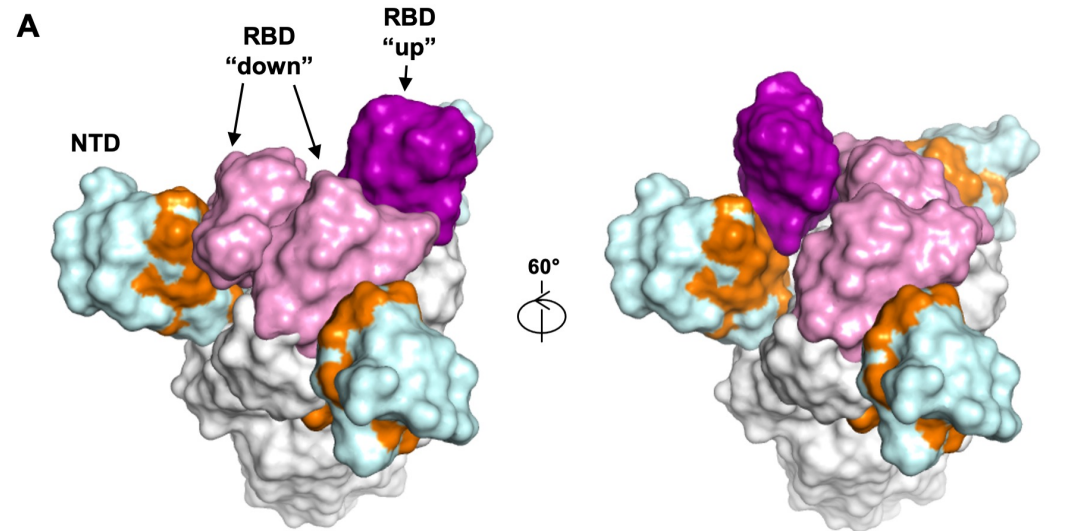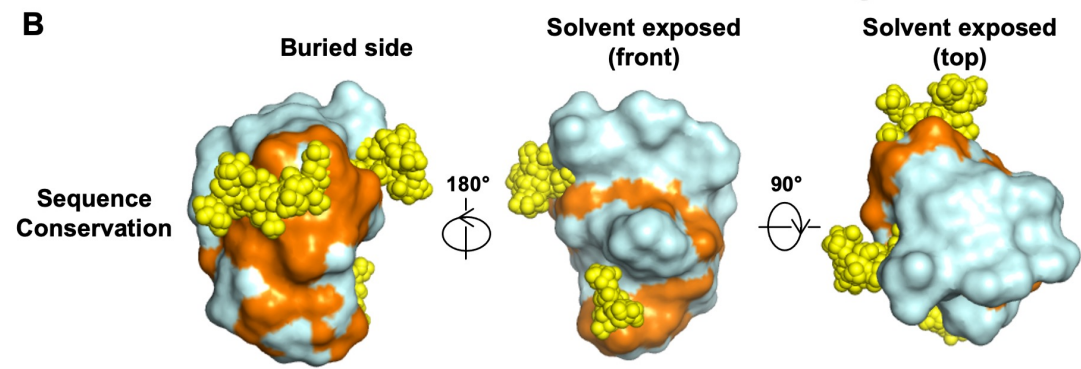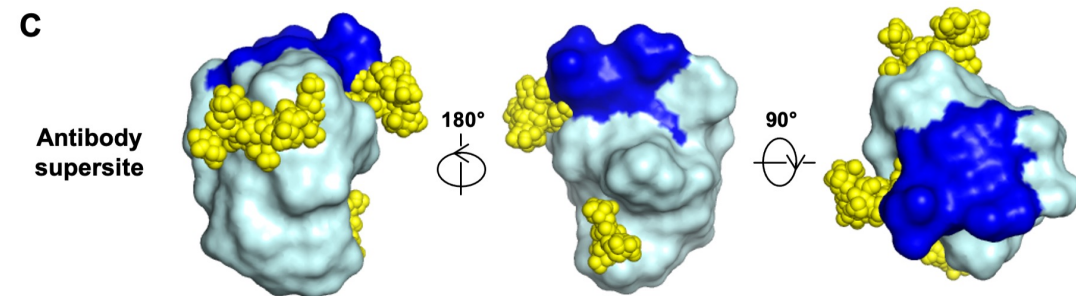

| TABLE 1: RBD and NTD ELISA results from the plasma of COVID-19 patients |                   |                  |                  |
|-------------------------------------------------------------------------|-------------------|------------------|------------------|
|                                                                         | Numbers of sample | RBD positive (%) | NTD positive (%) |
| Days 1-7                                                                | 21                | 12 (57.1)        | 1 (4.8)          |
| Days 8-14                                                               | 27                | 16 (59.3)        | 11 (40.7)        |
| Days 15-21                                                              | 12                | 12 (100)         | 7 (58.3)         |
| Days 22-28                                                              | 14                | 14 (100)         | 10 (71.4)        |
| Days >28                                                                | 153               | 150 (98.0)       | 135 (88.2)       |
| Total                                                                   | 227               | 204 (89.9)       | 164 (72.2)       |

A

|                |     |     |     |     |     |    |
|----------------|-----|-----|-----|-----|-----|----|
| SARS-CoV-2 RBD | 1   | 10  | 20  | 30  | 40  | 50 |
| SARS-CoV RBD   | 1   | 10  | 20  | 30  | 40  | 50 |
| SARS-CoV-2 RBD | 60  | 70  | 80  | 90  | 100 |    |
| SARS-CoV RBD   | 60  | 70  | 80  | 90  | 100 |    |
| SARS-CoV-2 RBD | 110 | 120 | 130 | 140 | 150 |    |
| SARS-CoV RBD   | 110 | 120 | 130 | 140 | 150 |    |
| SARS-CoV-2 RBD | 160 | 170 | 180 | 190 | 200 |    |
| SARS-CoV RBD   | 160 | 170 | 180 | 190 | 200 |    |
| SARS-CoV-2 RBD | 210 | 220 | 223 |     |     |    |
| SARS-CoV RBD   | 210 | 220 | 223 |     |     |    |

B

|                |     |     |     |     |     |     |
|----------------|-----|-----|-----|-----|-----|-----|
| SARS-CoV-2 NTD | 1   | 10  | 20  | 30  | 40  | 50  |
| SARS-CoV NTD   | 1   | 10  | 20  | 30  | 40  | 50  |
| SARS-CoV-2 NTD | 60  | 70  | 80  | 90  | 100 |     |
| SARS-CoV NTD   | 60  | 70  | 80  | 90  | 100 |     |
| SARS-CoV-2 NTD | 110 | 120 | 130 | 140 | 150 |     |
| SARS-CoV NTD   | 110 | 120 | 130 | 140 | 150 |     |
| SARS-CoV-2 NTD | 160 | 170 | 180 | 190 | 200 | 210 |
| SARS-CoV NTD   | 160 | 170 | 180 | 190 | 200 | 210 |
| SARS-CoV-2 NTD | 220 | 230 | 240 | 250 | 260 |     |
| SARS-CoV NTD   | 220 | 230 | 240 | 250 | 260 |     |
| SARS-CoV-2 NTD | 270 | 280 | 282 |     |     |     |
| SARS-CoV NTD   | 270 | 280 | 282 |     |     |     |



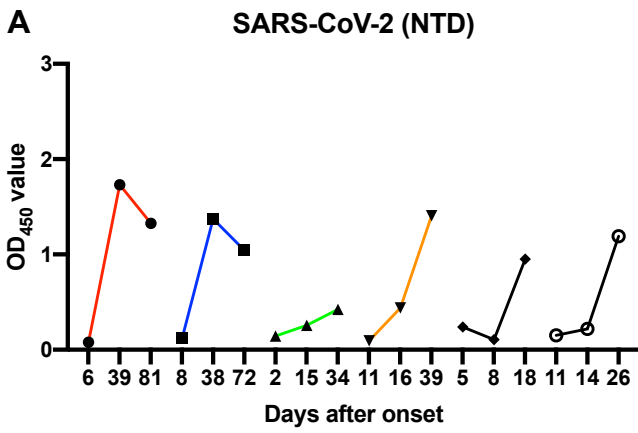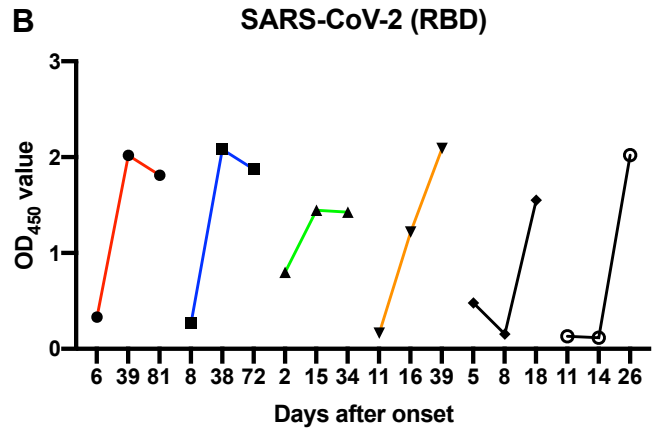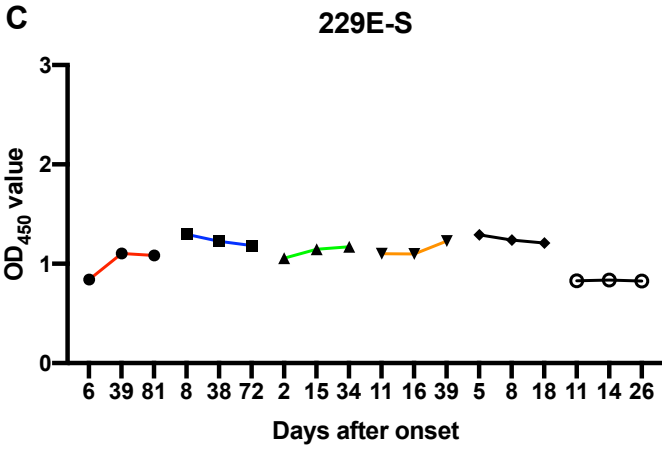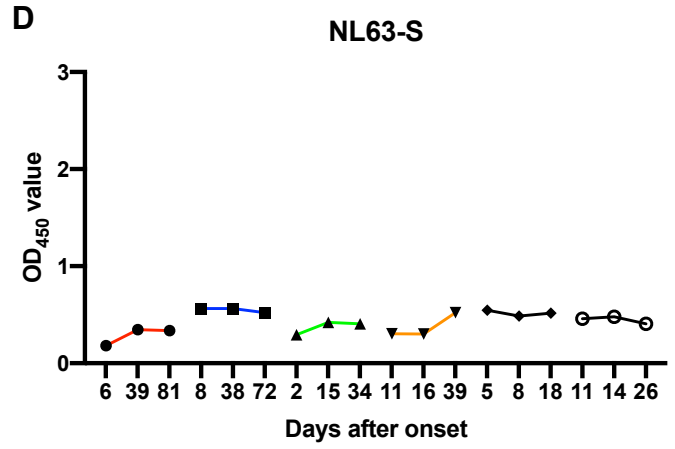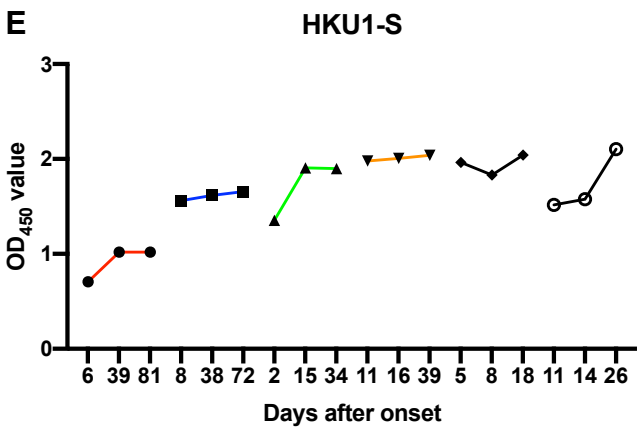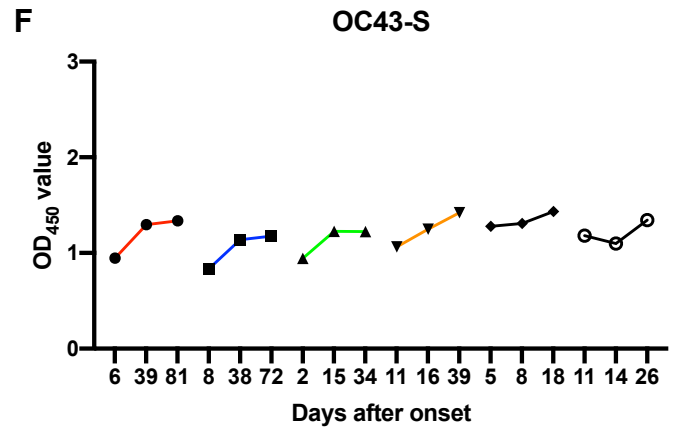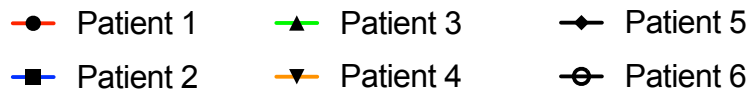

Source: https://biorxiv.org/content/10.1101/2021.02.17.431722v1.full.pdf
